# Supplementary material for: Stem Cell Antigen-1 (Sca-1) Regulates Mammary Tumor Development and Cell Migration
Source: PLoS One. 2011 Nov 29;6(11):e27841. doi: 10.1371/journal.pone.0027841 (PMC3226565; doi:10.1371/journal.pone.0027841)
Supplement: Table S1 — Differentially expressed genes in shSca-1 tumor cells. Listed are statistically significant genes with p<0.01 and a fold change >1.5 in shSca-1 cells compared to shLuc control cells. (XLS) [file pone.0027841.s003.xls]

## Sheet: Table S1
Table S1. Differentially expressed genes in shSca-1 and shLuc tumor cells
Probe ID	Gene Title	Gene Symbol	Fold Change
1417185_at	lymphocyte antigen 6 complex, locus A	Ly6a	-19.7277
1417447_at	transcription factor 21	Tcf21	-9.2284
1418858_at	aldehyde oxidase 3	Aox3	-8.13657
1426818_at	arrestin domain containing 4	Arrdc4	-7.76326
1427321_s_at	coxsackievirus and adenovirus receptor	Cxadr	-7.7579
1456768_a_at	multimerin 2	Mmrn2	-7.69077
1428062_at	carboxypeptidase A1	Cpa1	-7.59667
1422667_at	keratin 15	Krt15	-7.53942
1434527_at	NACHT, leucine rich repeat and PYD containing 4B	Nalp4b	-6.86016
1434640_at	neurensin 2	Nrsn2	-6.662
1431914_at	phosphodiesterase 3A, cGMP inhibited	Pde3a	-6.55309
1438608_at	Troponin I, skeletal, fast 2	Tnni2	-6.45455
1453282_at	coxsackievirus and adenovirus receptor	Cxadr	-6.26324
1453318_at	transmembrane protein 102	Tmem102	-6.17353
1435917_at	OCIA domain containing 2	Ociad2	-5.9711
1443700_at	B-cell CLL/lymphoma 9-like	Bcl9l	-5.77099
1419233_x_at	apolipoprotein A-I	Apoa1	-5.53378
1448511_at	protein tyrosine phosphatase, receptor type, C polypeptide-associated protein	Ptprcap	-5.29667
1433263_at	---	---	-5.08777
1425685_at	RIKEN cDNA 2310005E10 gene	2310005E10Rik	-4.94241
1417528_at	sperm associated antigen 6	Spag6	-4.71429
1430386_at	RIKEN cDNA E030024N20 gene	E030024N20Rik	-4.63006
1455636_at	limbic system-associated membrane protein	Lsamp	-4.61033
1447574_s_at	Solute carrier family 32 (GABA vesicular transporter), member 1	Slc32a1	-4.59403
1458514_at	expressed sequence AA536887	AA536887	-4.51333
1434442_at	DNA segment, Chr 5, ERATO Doi 593, expressed	D5Ertd593e	-4.50767
1415897_a_at	microsomal glutathione S-transferase 1	Mgst1	-4.44392
1456459_x_at	coiled-coil domain containing 53	Ccdc53	-4.43548
1417745_at	carboxypeptidase N, polypeptide 1	Cpn1	-4.3932
1457236_at	G protein-coupled receptor 62	Gpr62	-4.30667
1455697_at	Hypothetical LOC629059	LOC629059	-4.23404
1448025_at	similar to SIRP beta 1 isoform 2	LOC668101	-4.2029
1440527_at	Transcribed locus	---	-4.16191
1446082_at	Jumonji, AT rich interactive domain 2	Jarid2	-4.1058
1453003_at	sortilin-related receptor, LDLR class A repeats-containing	Sorl1	-4.08293
1445806_at	component of oligomeric golgi complex 5	Cog5	-4.07504
1416619_at	RIKEN cDNA 4632428N05 gene	4632428N05Rik	-3.93732
1436550_at	F-box protein 30	Fbxo30	-3.92878
1452320_at	low density lipoprotein receptor-related protein 2	Lrp2	-3.91592
1437114_at	RIKEN cDNA A930001N09 gene	A930001N09Rik	-3.9027
1453192_at	RIKEN cDNA 3110032G18 gene	3110032G18Rik	-3.74333
1446809_at	Zinc finger, BED domain containing 4	Zbed4	-3.69931
1437038_x_at	RIKEN cDNA 1700029I08 gene	1700029I08Rik	-3.68513
1446447_at	RIKEN cDNA 4921537D05 gene	4921537D05Rik	-3.68264
1450820_a_at	netrin G2	Ntng2	-3.67919
1433424_at	---	---	-3.63686
1419782_at	expressed sequence AA517864	AA517864	-3.56333
1452670_at	myosin, light polypeptide 9, regulatory	Myl9	-3.53413
1443278_at	---	---	-3.50166
1456659_at	hypothetical LOC552902	LOC552902	-3.48943
1432037_at	protein phosphatase 1, regulatory (inhibitor) subunit 9A	Ppp1r9a	-3.46885
1425020_at	UBX domain containing 4 /// predicted gene, EG621629 /// similar to UBX domain containing 4	Ubxd4 /// EG621629 /// LOC637151	-3.46449
1453219_a_at	RIKEN cDNA 2410004F06 gene	2410004F06Rik	-3.41748
1446138_at	Kinesin-associated protein 3	Kifap3	-3.30943
1451077_at	ribosomal protein L5 /// similar to 60S ribosomal protein L5 /// predicted gene, EG665407 /// similar to 60S ribosomal protein L5 /// similar to 60S ribosomal protein L5 /// similar to 60S ribosomal protein L5	Rpl5 /// LOC382740 /// EG665407 /// LOC668032 /// LOC672748 /// LOC675821	-3.26501
1433639_at	RIKEN cDNA 5730593F17 gene	5730593F17Rik	-3.24482
1445579_at	arachidonate lipoxygenase, epidermal	Alox12e	-3.24462
1440845_at	RIKEN cDNA E030031F02 gene	E030031F02Rik	-3.16468
1418486_at	vanin 1	Vnn1	-3.16083
1437162_at	GPI-anchored membrane protein 1	Gpiap1	-3.14113
1440026_at	Trichorhinophalangeal syndrome I (human)	Trps1	-3.13042
1438213_at	RIKEN cDNA A830018L16 gene	A830018L16Rik	-3.12956
1415857_at	embigin	Emb	-3.09063
1415856_at	embigin	Emb	-3.08897
1438156_x_at	carnitine palmitoyltransferase 1a, liver	Cpt1a	-3.08656
1448664_a_at	SPEG complex locus	Speg	-3.07323
1424759_at	arrestin domain containing 4	Arrdc4	-3.05383
1423666_s_at	ribosomal protein L5 /// similar to 60S ribosomal protein L5 /// predicted gene, EG665407 /// similar to 60S ribosomal protein L5 /// similar to 60S ribosomal protein L5 /// similar to 60S ribosomal protein L5	Rpl5 /// LOC382740 /// EG665407 /// LOC668032 /// LOC672748 /// LOC675821	-3.01168
1423792_a_at	CKLF-like MARVEL transmembrane domain containing 6	Cmtm6	-2.99294
1453312_at	IQ motif and WD repeats 1	Iqwd1	-2.99235
1428083_at	RIKEN cDNA 2310043N10 gene	2310043N10Rik	-2.98787
1430882_at	---	---	-2.98706
1451114_at	CKLF-like MARVEL transmembrane domain containing 6	Cmtm6	-2.98373
1434866_x_at	carnitine palmitoyltransferase 1a, liver	Cpt1a	-2.9312
1447575_at	---	---	-2.92652
1452892_at	serine/threonine kinase 33	Stk33	-2.90634
1427537_at	epiplakin 1	Eppk1	-2.89443
1433298_at	RIKEN cDNA 5830461L22 gene	5830461L22Rik	-2.89172
1441145_at	RIKEN cDNA D030065N23 gene	D030065N23Rik	-2.88515
1447303_at	---	---	-2.8826
1459076_at	CDNA sequence BC052040	BC052040	-2.81529
1427152_at	glutamine and serine rich 1	Qser1	-2.81121
1447816_x_at	oxidoreductase NAD-binding domain containing 1	Oxnad1	-2.79533
1422951_at	protocadherin beta 4	Pcdhb4	-2.79416
1448983_at	CMT1A duplicated region transcript 4	Cdrt4	-2.78415
1454918_at	alkylglycerone phosphate synthase	Agps	-2.78271
1425981_a_at	retinoblastoma-like 2 /// similar to retinoblastoma-like 2	Rbl2 /// LOC635075	-2.7727
1419450_at	ORM1-like 3 (S. cerevisiae)	Ormdl3	-2.7643
1415806_at	plasminogen activator, tissue	Plat	-2.72997
1460409_at	carnitine palmitoyltransferase 1a, liver	Cpt1a	-2.71939
1456357_at	RIKEN cDNA A930041I02 gene	A930041I02Rik	-2.71286
1443334_at	RIKEN cDNA D430042O09 gene	D430042O09Rik	-2.70175
1419289_a_at	synaptogyrin 1	Syngr1	-2.69408
1434982_at	Ring finger protein 182	Rnf182	-2.67898
1420793_at	major urinary protein 4	Mup4	-2.63573
1434446_at	RIKEN cDNA D630014A15 gene	D630014A15Rik	-2.62115
1438245_at	---	---	-2.61343
1438955_x_at	peptidylprolyl isomerase F (cyclophilin F)	Ppif	-2.61003
1445676_at	---	---	-2.60722
1422174_at	pancreatic and duodenal homeobox 1	Pdx1	-2.60535
1434045_at	cyclin-dependent kinase inhibitor 1B	Cdkn1b	-2.57427
1439422_a_at	C1q domain containing 2	C1qdc2	-2.56996
1439369_x_at	solute carrier family 9 (sodium/hydrogen exchanger), isoform 3 regulator 2	Slc9a3r2	-2.55525
1454294_at	RIKEN cDNA 2310061A09 gene	2310061A09Rik	-2.54392
1423294_at	mesoderm specific transcript	Mest	-2.54244
1433737_at	similar to U2AF homology motif (UHM) kinase 1	LOC677213	-2.52265
1439794_at	---	---	-2.48504
1453073_at	RIKEN cDNA 5830403F22 gene	5830403F22Rik	-2.46133
1435140_at	insulin degrading enzyme	Ide	-2.4515
1425914_a_at	armadillo repeat containing, X-linked 1	Armcx1	-2.44297
1439802_at	serine/threonine kinase 35	Stk35	-2.44061
1456956_at	IKAROS family zinc finger 2	Ikzf2	-2.43534
1459939_at	Transcribed locus	---	-2.43257
1459584_at	vacuolar protein sorting 24 (yeast)	Vps24	-2.42207
1444832_at	Huntingtin interacting protein 1 related	Hip1r	-2.42074
1450809_at	seminal vesicle antigen-like 2	Sval2	-2.40869
1439477_at	ubiquitin-conjugating enzyme E2B, RAD6 homology (S. cerevisiae)	Ube2b	-2.40051
1441860_x_at	Insulin degrading enzyme	Ide	-2.37093
1418774_a_at	ATPase, Cu++ transporting, alpha polypeptide	Atp7a	-2.36429
1441850_x_at	transcobalamin 2	Tcn2	-2.3561
1439652_at	---	---	-2.35452
1423121_at	insulin degrading enzyme	Ide	-2.34643
1454426_at	RIKEN cDNA 4930519E07 gene	4930519E07Rik	-2.3406
1434941_s_at	ESF1, nucleolar pre-rRNA processing protein, homolog (S. cerevisiae)	Esf1	-2.33182
1426187_a_at	HCLS1 associated X-1	Hax1	-2.33042
1458586_at	---	---	-2.3267
1443517_at	RIKEN cDNA 6030443O07 gene	6030443O07Rik	-2.32416
1452821_at	Tia1 cytotoxic granule-associated RNA binding protein-like 1	Tial1	-2.31404
1457825_x_at	transcobalamin 2	Tcn2	-2.30842
1416940_at	peptidylprolyl isomerase F (cyclophilin F)	Ppif	-2.30468
1424072_at	RIKEN cDNA 2010107G23 gene	2010107G23Rik	-2.30426
1447845_s_at	vanin 1	Vnn1	-2.29103
1418146_a_at	retinoblastoma-like 2 /// similar to retinoblastoma-like 2	Rbl2 /// LOC635075	-2.28229
1449168_a_at	A kinase (PRKA) anchor protein 2	Akap2	-2.28057
1434481_at	RIKEN cDNA 4121402D02 gene	4121402D02Rik	-2.27636
1448727_at	transducin-like enhancer of split 6, homolog of Drosophila E(spl)	Tle6	-2.26174
1457339_at	---	---	-2.25403
1454997_at	methionine sulfoxide reductase B3	Msrb3	-2.25355
1426375_s_at	oxidoreductase NAD-binding domain containing 1	Oxnad1	-2.24296
1450957_a_at	sequestosome 1	Sqstm1	-2.22995
1456747_x_at	Cd99 antigen-like 2	Cd99l2	-2.2269
1455870_at	A kinase (PRKA) anchor protein 2	Akap2	-2.2222
1418162_at	toll-like receptor 4	Tlr4	-2.21362
1431218_at	zinc finger, DHHC domain containing 20	Zdhhc20	-2.21267
1424952_at	OCIA domain containing 1	Ociad1	-2.20519
1416416_x_at	glutathione S-transferase, mu 1	Gstm1	-2.20508
1440707_at	doublesex and mab-3 related transcription factor 3	Dmrt3	-2.20407
1448200_at	transcobalamin 2	Tcn2	-2.20338
1435098_at	similar to Na+ dependent glucose transporter 1	LOC213332	-2.19722
1434556_at	Bone marrow macrophage cDNA, RIKEN full-length enriched library, clone:I830003K21 product:unclassifiable, full insert sequence	---	-2.1858
1428651_at	kelch-like 24 (Drosophila)	Klhl24	-2.17851
1433728_at	cDNA sequence BC038479	BC038479	-2.1782
1426858_at	inhibin beta-B	Inhbb	-2.17769
1439314_at	circadian locomoter output cycles kaput	Clock	-2.16924
1435770_at	thioredoxin domain containing 13	Txndc13	-2.16881
1441577_at	RIKEN cDNA C530014P21 gene	C530014P21Rik	-2.16865
1457900_at	activating signal cointegrator 1 complex subunit 3	Ascc3	-2.16251
1460474_at	RIKEN cDNA 2610028L16 gene	2610028L16Rik	-2.15472
1431524_at	RIKEN cDNA 4933427I22 gene	4933427I22Rik	-2.15194
1416513_at	laminin, beta 2	Lamb2	-2.14824
1418324_at	feminization 1 homolog b (C. elegans)	Fem1b	-2.14764
1450382_at	neurofibromatosis 2	Nf2	-2.14601
1419772_at	Transcribed locus	---	-2.14235
1438180_x_at	silica-induced gene 111 /// HCLS1 associated X-1	Silg111 /// Hax1	-2.11635
1445938_at	RIKEN cDNA 5930427L02 gene	5930427L02Rik	-2.11136
1416187_s_at	proline-rich nuclear receptor coactivator 2	Pnrc2	-2.10778
1453120_at	thioredoxin domain containing 13	Txndc13	-2.09833
1434942_at	ESF1, nucleolar pre-rRNA processing protein, homolog (S. cerevisiae)	Esf1	-2.09056
1430030_at	RIKEN cDNA 5330426P16 gene	5330426P16Rik	-2.08897
1429441_at	F-box protein 30	Fbxo30	-2.08783
1448330_at	glutathione S-transferase, mu 1	Gstm1	-2.06313
1436073_at	RIKEN cDNA A630007B06 gene /// similar to oocyte-testis gene 1	A630007B06Rik /// LOC671029	-2.03455
1438401_at	ubinuclein 1	Ubn1	-2.03227
1427514_at	hypothetical protein LOC624295	LOC624295	-2.02185
1436040_at	RIKEN cDNA 2310005L22 gene	2310005L22Rik	-2.02069
1440125_at	RIKEN cDNA A530054K11 gene	A530054K11Rik	-2.01978
1456706_at	RIKEN cDNA 4833441D16 gene	4833441D16Rik	-2.01892
1443475_at	Histone cluster 1, H3i	Hist1h3i	-2.0165
1424024_at	multiple coagulation factor deficiency 2	Mcfd2	-2.01327
1458724_at	RIKEN cDNA E230008O15 gene	E230008O15Rik	-2.01026
1434379_at	Max dimerization protein 4	Mxd4	-2.00951
1429351_at	kelch-like 24 (Drosophila)	Klhl24	-2.00621
1416488_at	cyclin G2	Ccng2	-1.99276
1440195_at	Serpine1 mRNA binding protein 1	Serbp1	-1.9922
1419286_s_at	intraflagellar transport 81 homolog (Chlamydomonas)	Ift81	-1.98826
1417703_at	poliovirus receptor-related 2	Pvrl2	-1.97571
1446892_at	Leucine rich repeat containing 16	Lrrc16	-1.96836
1433514_at	ethanolamine kinase 1	Etnk1	-1.96828
1460453_at	T-cell activation Rho GTPase-activating protein	Tagap	-1.9658
1448343_a_at	neighbor of Brca1 gene 1	Nbr1	-1.95693
1457669_x_at	replication factor C (activator 1) 2	Rfc2	-1.94409
1443748_x_at	ankyrin repeat domain 44	Ankrd44	-1.93803
1417503_at	replication factor C (activator 1) 2	Rfc2	-1.93656
1453727_at	ESF1, nucleolar pre-rRNA processing protein, homolog (S. cerevisiae)	Esf1	-1.92854
1457638_x_at	replication factor C (activator 1) 2	Rfc2	-1.92435
1437286_x_at	---	---	-1.92046
1438076_at	ribosomal protein L30	Rpl30	-1.91937
1459992_x_at	ceroid-lipofuscinosis, neuronal 8	Cln8	-1.91653
1460634_at	ral guanine nucleotide dissociation stimulator	Ralgds	-1.91267
1433372_at	RIKEN cDNA 5330425B07 gene	5330425B07Rik	-1.91191
1425503_at	glucosaminyl (N-acetyl) transferase 2, I-branching enzyme	Gcnt2	-1.9105
1419068_at	RAB guanine nucleotide exchange factor (GEF) 1	Rabgef1	-1.90965
1421820_a_at	neurofibromatosis 2	Nf2	-1.90599
1427084_a_at	mitogen-activated protein kinase kinase kinase kinase 5	Map4k5	-1.89955
1457805_at	---	---	-1.89458
1422592_at	catenin (cadherin associated protein), delta 2	Ctnnd2	-1.89238
1424915_s_at	---	---	-1.89161
1448765_at	Fyn proto-oncogene	Fyn	-1.89153
1422467_at	palmitoyl-protein thioesterase 1	Ppt1	-1.8884
1426946_at	RAN binding protein 5	Ranbp5	-1.88665
1422774_at	RIKEN cDNA 1700088E04 gene	1700088E04Rik	-1.8861
1435266_at	RIKEN cDNA A930041I02 gene	A930041I02Rik	-1.87656
1431708_a_at	cytotoxic granule-associated RNA binding protein 1	Tia1	-1.87628
1460558_at	coiled-coil domain containing 32	Ccdc32	-1.87286
1437100_x_at	proviral integration site 3	Pim3	-1.87245
1438618_at	expressed sequence AI507597	AI507597	-1.86995
1442291_at	endothelial differentiation, lysophosphatidic acid G-protein-coupled receptor 4	Edg4	-1.86341
1445922_at	X-ray repair complementing defective repair in Chinese hamster cells 4	Xrcc4	-1.86295
1441937_s_at	PTEN induced putative kinase 1	Pink1	-1.8628
1434636_at	homeodomain leucine zipper-encoding gene	Homez	-1.85697
1433649_at	amine oxidase, flavin containing 1	Aof1	-1.85406
1424004_x_at	RIKEN cDNA 4930444A02 gene	4930444A02Rik	-1.85077
1438451_at	Rho GTPase-activating protein	Grit	-1.8461
1454996_at	hydroxysteroid dehydrogenase like 1	Hsdl1	-1.84257
1434517_at	WD repeat and FYVE domain containing 2	Wdfy2	-1.82959
1451793_at	kelch-like 24 (Drosophila)	Klhl24	-1.82897
1417135_at	serine/arginine-rich protein specific kinase 2	Srpk2	-1.82754
1428919_at	Fgfr1 oncogene partner	Fgfr1op	-1.82561
1436862_at	double C2, alpha	Doc2a	-1.82539
1418123_at	unc-119 homolog (C. elegans)	Unc119	-1.82512
1448559_at	flotillin 1	Flot1	-1.82511
1428823_at	HD domain containing 2	Hddc2	-1.82109
1433623_at	zinc finger protein 367	Zfp367	-1.82083
1448939_at	ubiquitin specific peptidase 25	Usp25	-1.8188
1459008_at	---	---	-1.81491
1425490_a_at	WD repeat domain 13	Wdr13	-1.81335
1417409_at	Jun oncogene	Jun	-1.8095
1439278_at	zinc finger and BTB domain containing 20	Zbtb20	-1.80768
1451897_a_at	neighbor of Brca1 gene 1	Nbr1	-1.80761
1426756_at	UDP-N-acetyl-alpha-D-galactosamine:polypeptide N-acetylgalactosaminyltransferase 2	Galnt2	-1.80618
1455450_at	Protein tyrosine phosphatase, non-receptor type 3	Ptpn3	-1.80516
1423106_at	ubiquitin-conjugating enzyme E2B, RAD6 homology (S. cerevisiae)	Ube2b	-1.8042
1424159_at	RIKEN cDNA 1300010M03 gene	1300010M03Rik	-1.80404
1422431_at	melanoma antigen, family E, 1	Magee1	-1.80398
1439858_at	12 days embryo spinal ganglion cDNA, RIKEN full-length enriched library, clone:D130031D15 product:unclassifiable, full insert sequence	---	-1.79987
1440567_at	RIKEN cDNA D030051N19 gene	D030051N19Rik	-1.79484
1437366_at	expressed sequence AI608492	AI608492	-1.79206
1449263_at	ubiquitin-fold modifier 1	Ufm1	-1.79064
1444244_at	Transcribed locus	---	-1.78801
1450990_at	glypican 3	Gpc3	-1.78271
1428755_at	cAMP responsive element binding protein 1	Creb1	-1.78255
1437009_a_at	zinc finger protein 364	Zfp364	-1.78155
1417147_at	RIKEN cDNA B230317C12 gene	B230317C12Rik	-1.78129
1455143_at	neuroligin 2	Nlgn2	-1.78107
1424556_at	pyrroline-5-carboxylate reductase 1	Pycr1	-1.78106
1445375_at	intersectin 2	Itsn2	-1.78016
1423903_at	poliovirus receptor	Pvr	-1.779
1437204_a_at	transcription factor 25 (basic helix-loop-helix)	Tcf25	-1.77819
1445235_at	YTH domain family 3	Ythdf3	-1.77752
1424914_at	---	---	-1.77624
1425787_a_at	synaptotagmin-like 3	Sytl3	-1.77572
1428805_at	solute carrier family 35, member E3	Slc35e3	-1.77532
1423074_at	lectin, mannose-binding 2	Lman2	-1.76938
1439882_at	Sec23 interacting protein	Sec23ip	-1.76588
1436895_at	centaurin, delta 1	Centd1	-1.76251
1430951_at	RIKEN cDNA 2810011L19 gene	2810011L19Rik	-1.75721
1459869_x_at	RIKEN cDNA 4930402E16 gene	4930402E16Rik	-1.75144
1455280_at	Fras1 related extracellular matrix protein 1	Frem1	-1.75027
1435746_at	serine/arginine-rich protein specific kinase 2	Srpk2	-1.74938
1440372_at	ADP-ribosylation factor-like 15	Arl15	-1.74884
1428630_x_at	hydroxyacylglutathione hydrolase-like	Haghl	-1.74827
1433663_s_at	expressed sequence AU014645	AU014645	-1.74696
1449626_s_at	acyl-Coenzyme A binding domain containing 4	Acbd4	-1.74267
1459753_x_at	transformer 2 alpha homolog (Drosophila)	Tra2a	-1.73833
1419067_a_at	RAB guanine nucleotide exchange factor (GEF) 1	Rabgef1	-1.73536
1455604_at	frizzled homolog 5 (Drosophila)	Fzd5	-1.73435
1427054_s_at	ABI gene family, member 3 (NESH) binding protein	Abi3bp	-1.73246
1449407_at	intraflagellar transport 81 homolog (Chlamydomonas)	Ift81	-1.72904
1455388_at	protein-L-isoaspartate (D-aspartate) O-methyltransferase domain containing 1	Pcmtd1	-1.7285
1423107_at	ubiquitin-conjugating enzyme E2B, RAD6 homology (S. cerevisiae)	Ube2b	-1.72845
1420153_at	---	---	-1.72375
1429197_s_at	RAB GTPase activating protein 1-like	Rabgap1l	-1.72311
1438736_at	THO complex 2	Thoc2	-1.72235
1425610_s_at	UDP-N-acetyl-alpha-D-galactosamine:polypeptide N-acetylgalactosaminyltransferase 2	Galnt2	-1.722
1456027_at	RNA binding motif protein 41	Rbm41	-1.72072
1449076_x_at	acireductone dioxygenase 1	Adi1	-1.71984
1449007_at	B-cell translocation gene 3 /// similar to BTG3 protein (Tob5 protein) (Abundant in neuroepithelium area protein) /// B-cell translocation gene 3 pseudogene	Btg3 /// LOC640416 /// LOC654432	-1.71662
1417410_s_at	protein kinase C, iota	Prkci	-1.71438
1427151_at	glutamine and serine rich 1	Qser1	-1.71321
1456864_at	CDNA sequence BC002059	BC002059	-1.7127
1449628_s_at	START domain containing 7	Stard7	-1.71214
1430449_at	RIKEN cDNA C330002I19 gene	C330002I19Rik	-1.71036
1424609_a_at	similar to novel protein	LOC545174	-1.70947
1429217_at	zinc finger protein 655	Zfp655	-1.70641
1427413_a_at	CUG triplet repeat, RNA binding protein 1	Cugbp1	-1.69913
1435473_at	gene model 347, (NCBI)	Gm347	-1.6986
1436968_x_at	kelch-like 24 (Drosophila)	Klhl24	-1.69546
1441128_at	WD repeat domain 20a	Wdr20a	-1.69516
1457662_x_at	thiamine pyrophosphokinase	Tpk1	-1.69354
1435744_at	RIKEN cDNA 6720401G13 gene	6720401G13Rik	-1.69271
1441718_at	E3 ubiquitin protein ligase, HECT domain containing, 1	Edd1	-1.69215
1439638_at	Erbb2 interacting protein	Erbb2ip	-1.69057
1447191_at	---	---	-1.68826
1438487_s_at	zinc finger, ZZ domain containing 3	Zzz3	-1.68756
1438759_x_at	---	---	-1.68673
1460063_at	DNA segment, Chr 5, ERATO Doi 798, expressed	D5Ertd798e	-1.68515
1417191_at	DnaJ (Hsp40) homolog, subfamily B, member 9	Dnajb9	-1.67961
1451069_at	proviral integration site 3	Pim3	-1.67939
1434109_at	SH3 domain binding glutamic acid-rich protein like 2	Sh3bgrl2	-1.67929
1430075_at	splicing factor 3b, subunit 3	Sf3b3	-1.67857
1443241_at	Pseudouridylate synthase 7 homolog (S. cerevisiae)	Pus7	-1.67526
1439105_at	cytidine and dCMP deaminase domain containing 1	Cdadc1	-1.67521
1459033_at	Plexin A2	Plxna2	-1.67345
1435634_at	protein-L-isoaspartate (D-aspartate) O-methyltransferase domain containing 1	Pcmtd1	-1.67269
1425956_a_at	cytidine and dCMP deaminase domain containing 1	Cdadc1	-1.67087
1416896_at	ribosomal protein S6 kinase polypeptide 1	Rps6ka1	-1.66984
1435724_at	RIKEN cDNA 4933400N17 gene	4933400N17Rik	-1.66982
1419743_s_at	coactivator-associated arginine methyltransferase 1	Carm1	-1.66823
1453136_at	F-box protein 30	Fbxo30	-1.66635
1416479_a_at	transmembrane protein 14C	Tmem14c	-1.66441
1428145_at	acetyl-Coenzyme A acyltransferase 2 (mitochondrial 3-oxoacyl-Coenzyme A thiolase)	Acaa2	-1.66287
1456783_at	RIKEN cDNA 9330107J05 gene	9330107J05Rik	-1.6623
1438335_at	UDP-GlcNAc:betaGal beta-1,3-N-acetylglucosaminyltransferase-like 1	B3gntl1	-1.65937
1429429_s_at	protein-L-isoaspartate (D-aspartate) O-methyltransferase domain containing 1	Pcmtd1	-1.65806
1439678_at	Glutaminase	Gls	-1.65618
1434332_at	zinc finger, ZZ domain containing 3	Zzz3	-1.65429
1417527_at	adaptor-related protein complex 3, mu 2 subunit	Ap3m2	-1.65299
1438420_at	RNA binding motif protein 39	Rbm39	-1.65126
1425323_a_at	cDNA sequence BC008155	BC008155	-1.64766
1455196_s_at	expressed sequence AA987161	AA987161	-1.64436
1440470_at	Leucine rich repeat containing 14	Lrrc14	-1.64272
1433286_at	RIKEN cDNA 4833417J16 gene	4833417J16Rik	-1.63964
1447202_at	RIKEN cDNA 1200009F10 gene	1200009F10Rik	-1.63744
1424587_at	gem (nuclear organelle) associated protein 8	Gemin8	-1.63734
1426859_at	inhibin beta-B	Inhbb	-1.63675
1433457_s_at	G-rich RNA sequence binding factor 1	Grsf1	-1.63671
1454064_a_at	ring finger protein 138	Rnf138	-1.63366
1437298_at	WAS/WASL interacting protein family, member 2	Wipf2	-1.63144
1448694_at	Jun oncogene	Jun	-1.63083
1434148_at	transcription factor 4	Tcf4	-1.62757
1433581_at	RIKEN cDNA 1190002N15 gene	1190002N15Rik	-1.62464
1437921_x_at	zinc finger protein 516	Zfp516	-1.62208
1447931_at	Wolf-Hirschhorn syndrome candidate 1-like 1 (human)	Whsc1l1	-1.61809
1433824_x_at	G-rich RNA sequence binding factor 1	Grsf1	-1.61468
1423120_at	insulin degrading enzyme	Ide	-1.61463
1424752_x_at	zinc finger protein 71, related sequence 1	Zfp71-rs1	-1.61006
1452745_at	RIKEN cDNA 1810044A24 gene	1810044A24Rik	-1.61
1428380_at	RIKEN cDNA 0610007C21 gene	0610007C21Rik	-1.60926
1438167_x_at	Folliculin	Flcn	-1.60839
1420123_at	T-cell leukemia translocation altered gene	Tcta	-1.60815
1436584_at	sprouty homolog 2 (Drosophila)	Spry2	-1.59986
1456253_s_at	pleckstrin homology domain containing, family N member 1 /// kelch-like 17 (Drosophila)	Plekhn1 /// Klhl17	-1.59801
1427956_at	polycomb group ring finger 1	Pcgf1	-1.59408
1453491_at	RIKEN cDNA 4833409A17 gene	4833409A17Rik	-1.58706
1425262_at	CCAAT/enhancer binding protein (C/EBP), gamma	Cebpg	-1.58537
1458358_at	pantothenate kinase 2 (Hallervorden-Spatz syndrome)	Pank2	-1.58392
1460116_s_at	sprouty protein with EVH-1 domain 1, related sequence	Spred1	-1.58244
1431033_x_at	amylo-1,6-glucosidase, 4-alpha-glucanotransferase	Agl	-1.58162
1417535_at	F-box protein 25	Fbxo25	-1.58136
1455065_x_at	glucosamine-6-phosphate deaminase 1 /// similar to Glucosamine-6-phosphate isomerase (Glucosamine-6-phosphate deaminase) (GNPDA) (GlcN6P deaminase) (Oscillin) /// predicted gene, EG667410	Gnpda1 /// LOC231914 /// EG667410	-1.57877
1428677_at	WD repeat domain 73	Wdr73	-1.57519
1437838_x_at	G-rich RNA sequence binding factor 1	Grsf1	-1.57431
1416767_a_at	RIKEN cDNA 1110003E01 gene	1110003E01Rik	-1.57265
1438834_at	motile sperm domain containing 2	Mospd2	-1.57257
1443858_at	Hypothetical LOC552905	LOC552905	-1.5712
1416418_at	gamma-aminobutyric acid (GABA(A)) receptor-associated protein-like 1	Gabarapl1	-1.56951
1427060_at	mitogen activated protein kinase 3	Mapk3	-1.56876
1436849_x_at	glucosidase, alpha, acid	Gaa	-1.56691
1426978_at	kelch-like 2, Mayven (Drosophila)	Klhl2	-1.56673
1423217_a_at	RIKEN cDNA 2510049I19 gene	2510049I19Rik	-1.56607
1417630_at	MAP kinase-interacting serine/threonine kinase 1	Mknk1	-1.5643
1433563_s_at	Der1-like domain family, member 1	Derl1	-1.56355
1459054_at	cDNA sequence BC035954	BC035954	-1.56174
1416662_at	sarcosine dehydrogenase	Sardh	-1.55936
1445322_x_at	RIKEN cDNA E430025E21 gene	E430025E21Rik	-1.55813
1422468_at	palmitoyl-protein thioesterase 1	Ppt1	-1.55752
1424154_a_at	HESB like domain containing 1	Hbld1	-1.5566
1443949_at	Protein phosphatase 2, regulatory subunit B (B56), epsilon isoform	Ppp2r5e	-1.55631
1451984_at	heterogeneous nuclear ribonucleoprotein U-like 1	Hnrpul1	-1.55375
1416186_at	proline-rich nuclear receptor coactivator 2	Pnrc2	-1.55276
1426903_at	fibronectin type III domain containing 3a	Fndc3a	-1.5519
1436684_a_at	RIO kinase 2 (yeast)	Riok2	-1.55117
1420303_x_at	Similar to 40S ribosomal protein S4, X isoform	LOC667398	-1.55105
1448163_at	glucosamine-6-phosphate deaminase 1 /// similar to Glucosamine-6-phosphate isomerase (Glucosamine-6-phosphate deaminase) (GNPDA) (GlcN6P deaminase) (Oscillin) /// predicted gene, EG667410	Gnpda1 /// LOC231914 /// EG667410	-1.5508
1416419_s_at	gamma-aminobutyric acid (GABA(A)) receptor-associated protein-like 1	Gabarapl1	-1.55044
1425196_a_at	histidine triad nucleotide binding protein 2	Hint2	-1.54979
1460172_at	RIKEN cDNA 5730403B10 gene	5730403B10Rik	-1.54964
1434042_s_at	myotubularin related protein 3	Mtmr3	-1.54933
1429574_at	chloride intracellular channel 3	Clic3	-1.54866
1436788_at	---	---	-1.54478
1433702_at	DNA segment, Chr 19, Wayne State University 12, expressed	D19Wsu12e	-1.54466
1428267_at	DEAH (Asp-Glu-Ala-His) box polypeptide 40	Dhx40	-1.54216
1425577_at	RIKEN cDNA 9830124H08 gene	9830124H08Rik	-1.54088
1442311_at	Zinc finger RNA binding protein	Zfr	-1.53746
1437159_at	---	---	-1.53734
1429958_x_at	hydroxyacylglutathione hydrolase-like	Haghl	-1.53569
1447800_x_at	Transcobalamin 2	Tcn2	-1.53555
1437723_s_at	Der1-like domain family, member 1	Derl1	-1.53345
1430183_at	Pre B-cell leukemia transcription factor 1	Pbx1	-1.53339
1417722_at	BCNP1 homolog	Bcnp1	-1.53289
1428341_at	zinc finger protein 655	Zfp655	-1.53085
1435937_at	serine palmitoyltransferase, long chain base subunit 2	Sptlc2	-1.52779
1450626_at	mannosidase, beta A, lysosomal	Manba	-1.52776
1451201_s_at	ribonuclease/angiogenin inhibitor 1	Rnh1	-1.52067
1452901_at	cAMP responsive element binding protein 1	Creb1	-1.52067
1435072_at	zinc finger, FYVE domain containing 1	Zfyve1	-1.51874
1436851_at	prostaglandin E receptor 1 (subtype EP1) /// protein kinase N1	Ptger1 /// Pkn1	-1.51856
1424192_at	RIKEN cDNA 1500011H22 gene	1500011H22Rik	-1.51828
1443789_x_at	cytochrome c oxidase, subunit VIIIc	Cox8c	-1.51469
1416424_at	mannose-6-phosphate receptor binding protein 1	M6prbp1	-1.51403
1420387_at	Mpv17 transgene, kidney disease mutant	Mpv17	-1.50956
1437634_at	THO complex 2	Thoc2	-1.50758
1440104_at	RAN binding protein 2	Ranbp2	-1.50642
1451754_a_at	WD repeat domain 45	Wdr45	-1.50481
1448761_a_at	coatomer protein complex, subunit gamma 2	Copg2	-1.50175
1428692_at	HD domain containing 3	Hddc3	-1.50023
1460260_s_at	karyopherin (importin) alpha 1	Kpna1	1.50158
1450854_at	proliferation-associated 2G4	Pa2g4	1.50529
1419548_at	karyopherin (importin) alpha 1	Kpna1	1.51533
1416498_at	peptidylprolyl isomerase C	Ppic	1.52519
1453370_at	trophinin associated protein	Troap	1.53359
1434767_at	expressed sequence C79407	C79407	1.53666
1435737_a_at	nuclear distribution gene E homolog 1 (A nidulans)	Nde1	1.53957
1448834_at	forkhead box M1	Foxm1	1.54275
1418656_at	LSM5 homolog, U6 small nuclear RNA associated (S. cerevisiae)	Lsm5	1.54742
1419627_s_at	C-type lectin domain family 4, member n	Clec4n	1.54982
1435005_at	centromere protein E	Cenpe	1.5539
1452978_at	transmembrane protein 138	Tmem138	1.55391
1449060_at	kinesin family member 2C /// similar to Kinesin-like protein KIF2C (Mitotic centromere-associated kinesin) (MCAK)	Kif2c /// LOC631653	1.55551
1442280_at	DNA segment, Chr 2, ERATO Doi 750, expressed	D2Ertd750e	1.55743
1442999_at	RIKEN cDNA B930036G03 gene	B930036G03Rik	1.56254
1434736_at	hepatic leukemia factor	Hlf	1.56283
1439394_x_at	cell division cycle 20 homolog (S. cerevisiae)	Cdc20	1.5676
1435302_at	TAF4B RNA polymerase II, TATA box binding protein (TBP)-associated factor	Taf4b	1.57783
1458516_at	NCK associated protein 1 like	Nckap1l	1.57875
1438952_x_at	TAR (HIV) RNA binding protein 2	Tarbp2	1.57906
1438313_at	Transcribed locus	---	1.58394
1436824_x_at	ring finger protein 26 /// predicted gene, EG668155 /// similar to ring finger protein 26	Rnf26 /// EG668155 /// LOC669536	1.58603
1432550_at	RIKEN cDNA 4930572D21 gene	4930572D21Rik	1.58808
1452073_at	RIKEN cDNA 6720460F02 gene	6720460F02Rik	1.59355
1447273_x_at	ATPase, class V, type 10A	Atp10a	1.60213
1449155_at	polymerase (RNA) III (DNA directed) polypeptide G	Polr3g	1.60439
1417584_at	solute carrier family 11 (proton-coupled divalent metal ion transporters), member 2	Slc11a2	1.60791
1440882_at	low density lipoprotein receptor-related protein 8, apolipoprotein e receptor	Lrp8	1.61014
1443973_at	dapper homolog 2, antagonist of beta-catenin (xenopus)	Dact2	1.61208
1428135_a_at	eukaryotic translation elongation factor 1 delta (guanine nucleotide exchange protein)	Eef1d	1.62115
1456163_at	RIKEN cDNA 2700049P18 gene	2700049P18Rik	1.62149
1427569_a_at	utrophin	Utrn	1.62803
1443357_at	Zinc finger RNA binding protein	Zfr	1.63352
1439693_a_at	F-box and WD-40 domain protein 16	Fbxw16	1.66686
1435630_s_at	acetyl-Coenzyme A acetyltransferase 2	Acat2	1.67578
1424374_at	GTPase, IMAP family member 4	Gimap4	1.67817
1416376_at	transmembrane protein 97	Tmem97	1.68846
1459146_at	mitogen-activated protein kinase 6	Mapk6	1.70517
1423025_a_at	schwannomin interacting protein 1	Schip1	1.7059
1460227_at	tissue inhibitor of metalloproteinase 1	Timp1	1.71411
1457079_at	RIKEN cDNA 8430426H19 gene	8430426H19Rik	1.71727
1454078_a_at	galactose-3-O-sulfotransferase 1	Gal3st1	1.71742
1457239_at	Spleen tyrosine kinase	Syk	1.72076
1424312_at	adiponectin receptor 1	Adipor1	1.72176
1458168_at	Adult male adrenal gland cDNA, RIKEN full-length enriched library, clone:7330440N08 product:hypothetical protein, full insert sequence	---	1.72211
1427630_x_at	CEA-related cell adhesion molecule 1	Ceacam1	1.73023
1453870_at	RIKEN cDNA 1810018F18 gene	1810018F18Rik	1.73266
1440448_at	Transcribed locus	---	1.73799
1418536_at	similar to H-2 class I histocompatibility antigen, Q7 alpha chain precursor (QA-2 antigen) /// region containing histocompatibility 2, Q region locus 9; histocompatibility 2, Q region locus 7	LOC630509 /// LOC674192	1.75486
1429313_at	receptor tyrosine kinase-like orphan receptor 1	Ror1	1.76791
1418476_at	cytokine receptor-like factor 1	Crlf1	1.76801
1431634_at	RIKEN cDNA 4930455C13 gene	4930455C13Rik	1.79543
1438615_x_at	RIKEN cDNA 2010317E24 gene	2010317E24Rik	1.79558
1432175_at	RIKEN cDNA 5430434I15 gene	5430434I15Rik	1.80629
1417784_at	amyotrophic lateral sclerosis 2 (juvenile) homolog (human)	Als2	1.80818
1457360_at	Craniofacial development protein 1	Cfdp1	1.82712
1443102_at	zinc finger protein 597	Zfp597	1.83813
1442905_at	ADP-ribosylation factor 4	Arf4	1.86996
1444542_at	Adult male aorta and vein cDNA, RIKEN full-length enriched library, clone:A530017F16 product:unclassifiable, full insert sequence	---	1.87582
1425195_a_at	acetyl-Coenzyme A acetyltransferase 2 /// acetyl-Coenzyme A acetyltransferase 3	Acat2 /// Acat3	1.8966
1443580_at	Syntaxin binding protein 6 (amisyn)	Stxbp6	1.89664
1438564_at	Growth arrest specific 2	Gas2	1.91017
1421287_a_at	platelet/endothelial cell adhesion molecule 1	Pecam1	1.91667
1416296_at	interleukin 2 receptor, gamma chain	Il2rg	1.91885
1429404_at	RIKEN cDNA 2010317E24 gene	2010317E24Rik	1.92843
1452524_a_at	ELAV (embryonic lethal, abnormal vision, Drosophila)-like 3 (Hu antigen C)	Elavl3	1.93543
1436088_at	RIKEN cDNA 0910001A06 gene	0910001A06Rik	1.93816
1440259_at	Mannosidase, alpha, class 1A, member 2	Man1a2	1.94225
1452477_at	RIKEN cDNA 3110057O12 gene	3110057O12Rik	1.94907
1426441_at	solute carrier family 11 (proton-coupled divalent metal ion transporters), member 2	Slc11a2	1.97001
1456474_at	---	---	1.98318
1442926_at	RIKEN cDNA 1700011B04 gene	1700011B04Rik	1.99158
1422524_at	ATP-binding cassette, sub-family B (MDR/TAP), member 6	Abcb6	1.99463
1440293_at	RIKEN cDNA C230081A13 gene	C230081A13Rik	2.02149
1452013_at	ATPase, class V, type 10A	Atp10a	2.06042
1450534_x_at	MHC (A.CA/J(H-2K-f) class I antigen	LOC56628	2.06069
1457941_at	Predicted gene, EG665467	EG665467	2.06328
1430278_a_at	DEAQ RNA-dependent ATPase	Dqx1	2.07699
1443030_at	l(3)mbt-like 3 (Drosophila)	L3mbtl3	2.07798
1446607_at	Microtubule-associated protein 7	Mtap7	2.09427
1421677_at	fibroblast growth factor 20	Fgf20	2.10234
1431899_at	NK6 transcription factor related, locus 3 (Drosophila)	Nkx6-3	2.1025
1445087_at	---	---	2.10779
1419168_at	mitogen-activated protein kinase 6	Mapk6	2.12282
1453530_at	---	---	2.14565
1441054_at	apolipoprotein L, 2	Apol2	2.20398
1428891_at	---	---	2.22299
1450291_s_at	membrane-spanning 4-domains, subfamily A, member 4C	Ms4a4c	2.22567
1446588_at	---	---	2.22571
1426318_at	serine (or cysteine) peptidase inhibitor, clade B, member 1b	Serpinb1b	2.23453
1447208_at	Transcribed locus	---	2.30852
1425034_at	solute carrier family 17 (sodium phosphate), member 2	Slc17a2	2.3507
1454580_at	RIKEN cDNA 5430427N15 gene	5430427N15Rik	2.3988
1442053_at	Phosphorylase kinase beta	Phkb	2.40757
1422777_at	complement component 1, q subcomponent-like 1	C1ql1	2.41857
1441167_at	Transcribed locus	---	2.4315
1444885_at	Transcribed locus	---	2.46731
1433198_at	RIKEN cDNA 4930445B03 gene	4930445B03Rik	2.51064
1449212_at	prolactin induced protein	Pip	2.51766
1432984_at	RIKEN cDNA 1700026H06 gene	1700026H06Rik	2.52552
1420198_at	---	---	2.52731
1424214_at	RIKEN cDNA 9130213B05 gene	9130213B05Rik	2.53373
1421392_a_at	baculoviral IAP repeat-containing 3	Birc3	2.53906
1455865_at	insulinoma-associated 1	Insm1	2.5748
1441365_at	forkhead box P2	Foxp2	2.63664
1432428_at	ankyrin repeat domain 55	Ankrd55	2.69344
1420245_x_at	transgelin 2 /// similar to transgelin 2	Tagln2 /// LOC672466	2.72417
1430164_a_at	growth factor receptor bound protein 10	Grb10	2.7514
1420180_at	---	---	2.83278
1452487_x_at	paired-Ig-like receptor A2	Pira2	2.89306
1420348_at	LIM homeobox protein 5	Lhx5	2.89481
1425746_at	RIKEN cDNA D730039F16 gene	D730039F16Rik	2.90149
1447912_x_at	A kinase (PRKA) anchor protein (yotiao) 9	Akap9	2.94398
1435695_a_at	RIKEN cDNA A030007L17 gene	A030007L17Rik	2.98258
1418418_a_at	prolactin-like protein C 1	Prlpc1	2.9906
1430744_at	napsin A aspartic peptidase	Napsa	3.02245
1438347_at	clarin 1	Clrn1	3.13869
1429513_at	RIKEN cDNA 1700019M22 gene	1700019M22Rik	3.15146
1431242_at	RIKEN cDNA 6330575P09 gene	6330575P09Rik	3.19667
1421537_at	homeo box D3	Hoxd3	3.22205
1441736_at	Integrin alpha FG-GAP repeat containing 1	Itfg1	3.22438
1421732_at	glutamine repeat protein 1	Glrp1	3.2984
1420756_at	fucosyltransferase 7	Fut7	3.34483
1444091_a_at	RIKEN cDNA 6430571L13 gene	6430571L13Rik	3.39374
1427346_at	ovary testis transcribed /// similar to ovary testis transcribed /// similar to ovary testis transcribed /// similar to ovary testis transcribed /// similar to ovary testis transcribed /// similar to ovary testis transcribed	Ott /// LOC434863 /// LOC434864 /// LOC434865 /// LOC666184 /// LOC666260	3.44332
1438101_at	Transcribed locus	---	3.52529
1445913_at	RIKEN cDNA A730090H04 gene	A730090H04Rik	3.53218
1421228_at	chemokine (C-C motif) ligand 7	Ccl7	3.57423
1445412_at	coiled-coil domain containing 73	Ccdc73	3.59898
1454527_at	RIKEN cDNA 8430437B07 gene	8430437B07Rik	3.70295
1422648_at	solute carrier family 7 (cationic amino acid transporter, y+ system), member 2	Slc7a2	4.04551
1457241_at	Leucine rich repeat containing 48	Lrrc48	4.15714
1446821_at	Protocadherin 17	Pcdh17	4.171
1436555_at	solute carrier family 7 (cationic amino acid transporter, y+ system), member 2	Slc7a2	4.22062
1460469_at	tumor necrosis factor receptor superfamily, member 9	Tnfrsf9	4.29142
1435459_at	flavin containing monooxygenase 2	Fmo2	4.34368
1446017_at	Transcribed locus	---	4.41707
1423954_at	complement component 3	C3	4.47765
1417779_at	RIKEN cDNA 2310079N02 gene	2310079N02Rik	4.49766
1423631_at	nuclear receptor subfamily 2, group E, member 3	Nr2e3	4.76032
1446898_at	Ubiquitin associated domain containing 1	Ubadc1	4.81551
1439866_at	p53-associated parkin-like cytoplasmic protein	Parc	5.02071
1428034_a_at	tumor necrosis factor receptor superfamily, member 9	Tnfrsf9	5.22199
1460540_at	neurexin I	Nrxn1	5.23322
1420288_at	expressed sequence T25656	T25656	5.59943
1447921_at	RIKEN cDNA E130309D02 gene	E130309D02Rik	6.22581
1438706_at	RIKEN cDNA 6430517E21 gene	6430517E21Rik	6.28
1456545_at	interleukin 18 receptor accessory protein	Il18rap	6.58277
1419728_at	chemokine (C-X-C motif) ligand 5	Cxcl5	7.58083
1421291_at	interleukin 18 receptor accessory protein	Il18rap	8.54836
1420380_at	chemokine (C-C motif) ligand 2	Ccl2	8.781
1458880_at	---	---	9.74854
1419394_s_at	S100 calcium binding protein A8 (calgranulin A)	S100a8	9.87775
1450826_a_at	serum amyloid A 3	Saa3	9.91535
1449486_at	carboxylesterase 1	Ces1	11.5759
1417633_at	superoxide dismutase 3, extracellular	Sod3	12.5459
1448291_at	matrix metallopeptidase 9	Mmp9	14.3615
1416298_at	matrix metallopeptidase 9	Mmp9	22.2011
