# Supplementary material for: Stem Cell Antigen-1 (Sca-1) Regulates Mammary Tumor Development and Cell Migration
Source: PLoS One. 2011 Nov 29;6(11):e27841. doi: 10.1371/journal.pone.0027841 (PMC3226565; doi:10.1371/journal.pone.0027841)
Supplement: Table S2 — Upregulated genes associated with Sca-1 loss in tumors. Listed are the statistically significant genes upregulated with p<0.01 and a fold change >1.5 in both shSca-1 cells and MP/DMBA tumors in Sca-1 knockout mice. (XLS) [file pone.0027841.s004.xls]

## Sheet: Sheet1
Table S2. Upregulated genes associated with Sca-1 loss in tumors.
Probe ID	Gene Symbol	Gene Name
107995	Cdc20	cell division cycle 20 homolog (S. cerevisiae)
11796	Birc3	baculoviral IAP repeat-containing 3
12931	Crlf1	cytokine receptor-like factor 1
14235	Foxm1	forkhead box M1
14347	Fut7	fucosyltransferase 7
17761	Mtap7	microtubule-associated protein 7
20296	Ccl2	chemokine (C-C motif) ligand 2
20657	Sod3	superoxide dismutase 3, extracellular
217653	C79407	expressed sequence C79407
21942	Tnfrsf9	tumor necrosis factor receptor superfamily, member 9
22288	Utrn	utrophin
26365	Ceacam1	CEA-related cell adhesion molecule 1
51944	D2Ertd750e	DNA segment, Chr 2, ERATO Doi 750, expressed
53626	Insm1	insulinoma-associated 1
69071	Tmem97	transmembrane protein 97
